# Supplementary material
Source: Springer Nature journal article supplement (https://www.springermedizin.de/resource/supplementary/12885_2011_3155_MOESM1_ESM.pdf/9462670)

**Figure 1**

**(a)**

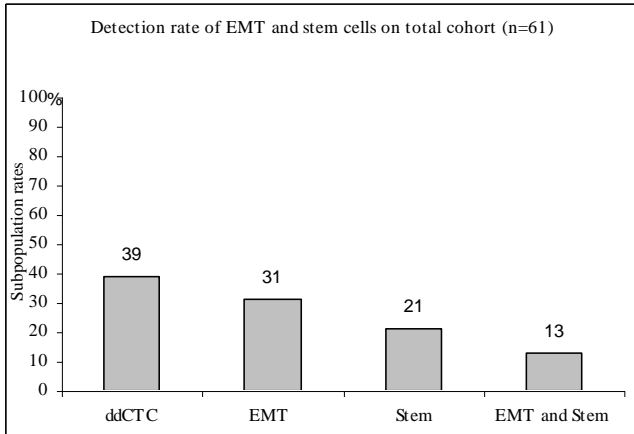

**(b)**

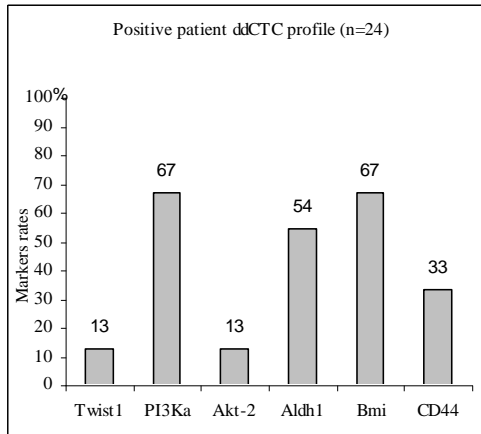

Supplement: MOESM1 [file 9462670]
